# Supplementary material for: Immune Modulation Ability of Hepcidin from Teleost Fish
Source: MDPI journal article supplement (doi:10.3390/ani12121586), 2022-06-20
Supplement: s1 [file s1]

**Table S1. Primer sequences used in this study**

| Species          | Molecule                       | Primer  | Sequence                           |
|------------------|--------------------------------|---------|------------------------------------|
| <i>D. labrax</i> | Interleukin 1 $\beta$          | Forward | 5'-ATTACCCACCACCCACTGAC-3'         |
|                  |                                | Reverse | 5'-TCTCTTCCACTATGCTCTCCAG-3'       |
|                  | Interleukin 10                 | Forward | 5'-ACCCCGTTCGCTTGCCA-3'            |
|                  |                                | Reverse | 5'-CATCTGGTGACATCACTC-3'           |
|                  | tumor necrosis factor $\alpha$ | Forward | 5'-GCCAAGCAAACAGCAGGAC-3'          |
|                  |                                | Reverse | 5'-ACAGCGGATATGGACGGTG-3'          |
|                  | $\beta$ -Actin                 | Forward | 5'-ATGTGGATCAGCAAGCAGG-3'          |
|                  |                                | Reverse | 5'-AGAAATGTGTGGTGTGGTCG-3'         |
| <i>O. mykiss</i> | Interleukin 1 $\beta$          | Forward | 5'-GTCACATTGCCAACCTCATCATCG-3'     |
|                  |                                | Reverse | 5'-GTTGAGCAGGTCCTTGTCCTTGAA-3'     |
|                  | Interleukin 10                 | Forward | 5'-GCTATGGACAGCATCCTGAAGT-3'       |
|                  |                                | Reverse | 5'-CGATGGAGTCGATGGGAGATTTA-3'      |
|                  | tumor necrosis factor $\alpha$ | Forward | 5'-CTGTGTGGCGTTCTCTTAATAGCAGCTT-3' |
|                  |                                | Reverse | 5'-CATTCCGTCCTGCATCGTTGC-3'        |
|                  | ELF-1 $\alpha$                 | Forward | 5'-GTCTACAAAATCGGCGGTAT-3'         |
|                  |                                | Reverse | 5'-CTTGACGGACACGTTCTTGA-3'         |
